# Supplementary material for: PPM1A Regulates Antiviral Signaling by Antagonizing TBK1-Mediated STING Phosphorylation and Aggregation
Source: PubMed Central journal article supplement (PMC4376777; doi:10.1371/journal.ppat.1004783), 2015-03-27

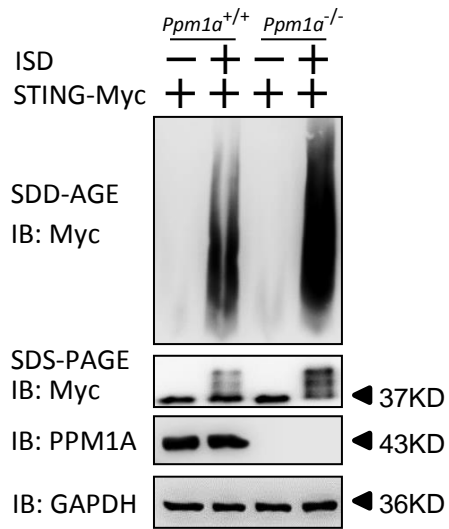

Supplement: ppat.1004783.s012.pdf [file ppat.1004783.s012.pdf]
