# Supplementary material for: PPM1A Regulates Antiviral Signaling by Antagonizing TBK1-Mediated STING Phosphorylation and Aggregation
Source: PLoS Pathog. 2015 Mar 27;11(3):e1004783. doi: 10.1371/journal.ppat.1004783 (PMC4376777; doi:10.1371/journal.ppat.1004783)
Supplement: S8 Fig — (A)The localizations of identified phosphorylation sites by mass spectrometry are shown, together with the structure of STING, in which cytoplasmic, membrane and non-cytoplasmic regions of STING were annotated by InterProScan (http://www.ebi.ac.uk/interpro/search/sequence-search). The blue rectangle represents non-cytoplasmic domain, the red rectangle represents transmembrane region, and the green rectangle represents cytoplasmic domain. (B)The representative identified fragment ions, including b and y ions, from MS/MS spectra for S358 site of STING. “ph” means phosphorylation. Specific y ions surrounding phosphorylated S358 were identified, indicating a reliable identification. (C)Sequence alignment for STING protein sequences showed evolutionary conservation of S358 among mammals. (PDF) [file ppat.1004783.s009.pdf]

**A**

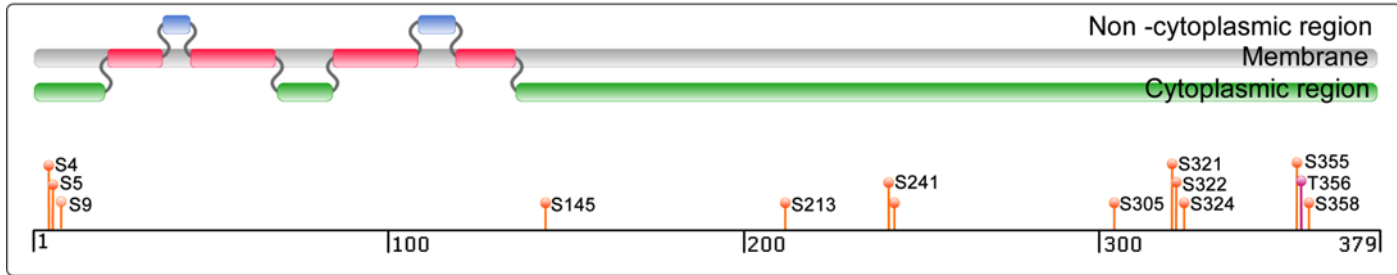

**B**

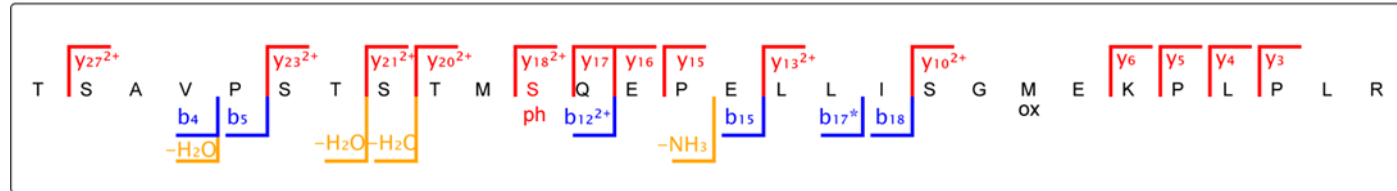

**C**

|                                                   |     |         |   |                       |     |
|---------------------------------------------------|-----|---------|---|-----------------------|-----|
| STING_HUMAN                                       | 351 | VPSTSTM | S | QEPELLISGMEKPLPLRTDFS | 379 |
| H2R3B4_PANTR                                      | 351 | VPSTSTM | S | QEPELLISGMEKPLPLRTDFS | 379 |
| H9YZQ6_MACMU                                      | 351 | VPSTSTM | S | QEPELLISGMEKPLPLRTDFS | 379 |
| STING_BOVIN                                       | 350 | MPGSSVL | S | QEPELLISGLEKPLPLRSDVF | 378 |
| STING_MOUSE                                       | 350 | APPPSVL | S | QEPRLISGMDQPLPLRTDLI  | 378 |
| F1M391_RAT                                        | 351 | APRPSLL | S | QEPRLISGMEQPLPLRTDLI  | 379 |
| * . * : * * * * . * * * * * : : : * * * * * : * . |     |         |   |                       |     |
